# Supplementary material
Source: publisher figshare collection journal article supplement (https://tandf.figshare.com/ndownloader/files/13152470)
Supplement: Supplementary file 1 [file 13152470]

## Sheet: Details
This spreadsheet file contains data on the sex ratio of the progeny (1-SR), the sex ratio of the progeny by replicate tank (2-SR_tanks), the sex ratio of the control albino fish (3-SR_albinos), individual biometric data for all fish (4-Biometric_data) and sex growth dimorphism per tank data (5-SDG_tank).
Αbbreviations:
LT: low temperature (16.5℃)
HT: high temperature (20℃)
Father codes: a, b, c, d
M: males
F: females
DNA_tube: unique tube identifies
BW: body weight
FL: fork length
F_albino: albino fish
F_exp: experimental fish
K condition factor: K=100*(weight/length^3.02)

## Sheet: SR
Temp	M	F
LT	88.0952	11.9048
HT	96.61	3.39
LT	74.83	25.17
HT	87.31	12.69
LT	65	35
HT	72.73	27.27
LT	51.72	48.28
HT	73.21	26.79

## Sheet: SR_tanks
Temp	M	F
aLT3	92.31	7.69
aLT4	81.25	18.75
aHT3	95.65	4.35
aHT4	97.22	2.78
bLT3	77.78	22.22
bLT4	72	28
bHT3	85.14	14.86
bHT4	89.66	10.34
cLT1	62.26	37.74
cLT2	68.09	31.91
cHT1	76.19	23.81
cHT2	67.65	32.35
dLT1	58.82	41.18
dLT2	47.17	52.83
dHT1	71.43	28.57
dHT2	75	25

## Sheet: SR_albinos
Group	F_albino	F_exp
Hab1	32	26
Hab2	34	25
Hcd1	20	12
Hcd2	31	7
Lab1	58	38
Lab2	67	43
Lcd1	53	19
Lcd2	70	25

## Sheet: Biometric_father
DNA_tube	Father_ID	BW	FL	sex	Temperature	K condition factor
IF2011002502	d	42.9	15.42	m	LT	1.10775
IF2011002505	d	70.6	18.01	f	LT	1.14065
IF2011002506	c	75.2	18.31	f	LT	1.15584
IF2011002507	d	74.4	18.59	f	LT	1.09232
IF2011002509	c	66.4	17.68	f	LT	1.13441
IF2011002510	d	54.4	16.5	m	LT	1.14498
IF2011002511	d	58.8	17.18	m	LT	1.09549
IF2011002513	c	68.2	17.76	f	LT	1.14939
IF2011002514	d	59.9	17.47	m	LT	1.06097
IF2011002515	c	91.7	19.3	m	LT	1.20223
IF2011002516	c	57.6	16.73	m	LT	1.16269
IF2011002522	c	46.3	15.89	m	LT	1.09191
IF2011002524	c	67.5	17.55	f	LT	1.1792
IF2011002525	d	71.3	18.23	m	LT	1.11049
IF2011002526	c	46.4	15.94	f	LT	1.08394
IF2011002532	c	65.5	17.4	f	LT	1.17431
IF2011002534	d	44.9	15.55	m	LT	1.13037
IF2011002536	b	76.6	18.32	m	LT	1.17542
IF2011002537	d	55.4	16.96	m	LT	1.07311
IF2011002538	d	48.5	16.27	m	LT	1.065
IF2011002540	d	52.2	16.93	f	LT	1.01654
IF2011002542	d	60.6	17.07	m	LT	1.15114
IF2011002543	d	90.9	19.61	f	LT	1.13575
IF2011002545	c	47.5	16.14	m	LT	1.06862
IF2011002551	c	33.7	15.8	m	LT	0.80851
IF2011002556	c	46.6	15.77	f	LT	1.12443
IF2011002559	d	88.7	19.13	f	LT	1.19439
IF2011002564	c	54.5	16.66	f	LT	1.11414
IF2011002566	c	72.1	18.11	m	LT	1.14557
IF2011002567	c	61.6	16.98	m	LT	1.18896
IF2011002576	d	67.2	17.52	m	LT	1.18004
IF2011002577	c	108.6	19.92	f	LT	1.29412
IF2011002578	d	83.9	19.03	m	LT	1.14778
IF2011002581	d	68.5	17.76	m	LT	1.15444
IF2011002593	d	80.5	18.72	f	LT	1.15726
IF2011002597	d	98.9	19.93	f	LT	1.17675
IF2011002599	c	47.4	15.67	m	LT	1.16592
IF2011002603	d	53.8	16.53	m	LT	1.12616
IF2011002604	d	72.9	18.27	m	LT	1.12792
IF2011002605	d	38	15.12	m	LT	1.04121
IF2011002606	c	73.3	18	f	LT	1.18626
IF2011002607	d	50	16.2	f	LT	1.11233
IF2011002609	d	49.2	16.09	f	LT	1.11729
IF2011002610	c	62.5	17.28	m	LT	1.14419
IF2011002614	d	53.6	16.72	m	LT	1.08391
IF2011002615	c	112.3	20.99	f	LT	1.14262
IF2011002616	d	51.1	16.12	f	LT	1.15393
IF2011002617	d	64.6	17.36	f	LT	1.16625
IF2011002618	c	81.7	18.66	f	LT	1.18596
IF2011002621	c	49.8	15.98	m	LT	1.15459
IF2011002623	c	49.1	16.4	m	LT	1.05258
IF2011002624	d	59.8	17.03	f	LT	1.14402
IF2011002626	c	51	16.04	m	LT	1.1691
IF2011002628	c	49.7	16.24	m	LT	1.09745
IF2011002630	d	64.5	15.58	m	LT	1.61438
IF2011002633	c	62.4	17.07	m	LT	1.18533
IF2011002637	d	43.3	15.69	m	LT	1.06098
IF2011002638	c	46.4	15.72	m	LT	1.1304
IF2011002642	c	67.9	17.75	f	LT	1.14628
IF2011002643	c	40.6	15.22	m	LT	1.09052
IF2011002647	c	64.9	17.45	m	LT	1.15351
IF2011002648	d	75.3	18	m	LT	1.21863
IF2011002651	d	62.2	16.82	f	LT	1.23537
IF2011002652	c	59.4	16.53	m	LT	1.24338
IF2011002655	c	41	15.1	m	LT	1.12791
IF2011002656	d	74.4	18.19	f	LT	1.16648
IF2011002659	c	52.6	16.02	m	LT	1.21033
IF2011002660	c	57.8	16.98	f	LT	1.11562
IF2011002666	d	101.4	20.06	f	LT	1.18304
IF2011002675	d	61.8	17.04	f	LT	1.18019
IF2011002676	c	51.3	15.95	m	LT	1.19613
IF2011002680	d	68	17.92	m	LT	1.11539
IF2011002681	d	62.2	17.18	m	LT	1.15883
IF2011002683	c	47	16.25	m	LT	1.03591
IF2011002684	c	70.7	17.72	f	LT	1.19966
IF2011002686	d	58.8	17.25	f	LT	1.08212
IF2011002688	c	65.8	17.53	m	LT	1.15347
IF2011002693	c	51.8	16.43	f	LT	1.10434
IF2011002694	c	55.4	16.4	m	LT	1.18763
IF2011002696	d	73.3	18.53	f	LT	1.08673
IF2011002700	d	64.8	17.38	m	LT	1.1658
IF2011002701	d	49.3	16.75	m	LT	0.991567
IF2011002703	d	130.7	22.13	f	LT	1.13353
IF2011002709	d	56.8	16.74	f	LT	1.14448
IF2011002710	c	42.9	15.39	m	LT	1.11429
IF2011002715	d	51.6	16.67	f	LT	1.05294
IF2011002722	d	100.6	20.41	f	LT	1.11397
IF2011002724	c	49.7	16.18	m	LT	1.10979
IF2011002727	d	83.3	19.05	f	LT	1.13596
IF2011002728	c	71.3	17.67	f	LT	1.22021
IF2011002739	d	65	17.58	m	LT	1.12968
IF2011002743	c	59	17.28	m	LT	1.08011
IF2011002745	c	49.8	15.99	m	LT	1.15241
IF2011002749	c	84.1	18.72	f	LT	1.20902
IF2011002751	c	49.6	16.07	f	LT	1.13061
IF2011002762	d	42.8	15.27	m	LT	1.13828
IF2011002766	d	83.4	19.16	f	LT	1.11772
IF2011002770	d	68.9	18.18	f	LT	1.08205
IF2011002772	c	63.3	16.9	m	LT	1.23933
IF2011002773	c	77.9	18.32	f	LT	1.19537
IF2011002774	d	111.9	20.51	f	LT	1.22094
IF2011002779	d	56.9	17.05	f	LT	1.08469
IF2011002783	d	71.8	18.08	m	LT	1.14653
IF2011002784	d	61.1	16.65	f	LT	1.25133
IF2011002785	c	36.7	14.62	m	LT	1.11308
IF2011002790	c	71.5	18.07	f	LT	1.14365
IF2011002791	c	66.3	17.48	m	LT	1.1723
IF2011002793	d	141.9	22.42	f	LT	1.18321
IF2011002801	c	56.3	16.64	m	LT	1.15512
IF2011002812	d	47.9	15.73	m	LT	1.1647
IF2011002815	d	61.1	17.37	f	LT	1.10115
IF2011002821	d	91.7	19.62	m	LT	1.14398
IF2011002823	c	42	14.63	m	LT	1.27119
IF2011002829	c	43.5	15.32	m	LT	1.14553
IF2011002830	c	52.4	16.37	f	LT	1.12955
IF2011002832	c	60.8	17.2	f	LT	1.12878
IF2011002833	c	60.4	16.85	m	LT	1.19318
IF2011002834	c	67.1	17.52	m	LT	1.17828
IF2011002841	d	67.7	17.94	f	LT	1.10674
IF2011002843	d	76	18.9	f	LT	1.06145
IF2011002849	d	104.1	19.98	f	LT	1.22928
IF2011002854	d	59	16.94	m	LT	1.14692
IF2011002876	d	73.9	18.6	m	LT	1.08322
IF2011002879	d	88.8	19.38	f	LT	1.14975
IF2011002882	d	42.1	14.97	m	LT	1.18881
IF2011002883	c	39.7	14.83	m	LT	1.15331
IF2011002907	c	40.3	15.07	m	LT	1.11533
IF2011002942	c	69.3	18.15	m	LT	1.09377
IF2011002972	c	49	16.14	m	LT	1.10237
IF2011002985	d	39.7	15.41	m	LT	1.02713
IF2011008001	c	92.4	18.83	m	HT	1.30504
IF2011008002	b	66.3	18.02	m	LT	1.06938
IF2011008003	d	87	19.21	m	HT	1.15682
IF2011008004	b	86.3	19.72	m	LT	1.06021
IF2011008005	d	77.8	18.67	m	HT	1.12752
IF2011008006	a	77.2	18.67	m	LT	1.11882
IF2011008007	d	86.3	19.19	f	HT	1.15113
IF2011008008	c	52.7	16.06	m	HT	1.20354
IF2011008009	c	62.9	17.19	m	HT	1.16982
IF2011008010	c	54.2	16.21	f	HT	1.20352
IF2011008011	b	143.3	21.86	m	LT	1.28974
IF2011008012	d	95.2	19.21	f	HT	1.26586
IF2011008014	b	60.2	17.67	m	LT	1.03025
IF2011008015	d	131	21.67	f	HT	1.21054
IF2011008016	b	73.8	18.2	m	LT	1.15516
IF2011008017	d	95.1	19.37	m	HT	1.23324
IF2011008018	d	119.5	20.55	f	HT	1.29621
IF2011008019	b	61.1	17.12	m	LT	1.15043
IF2011008020	b	51.8	16.66	m	LT	1.05894
IF2011008021	b	58.1	16.92	f	LT	1.13346
IF2011008022	a	66.7	18.32	m	LT	1.02351
IF2011008023	b	76.9	18.75	m	LT	1.10018
IF2011008024	b	53.5	16.59	m	LT	1.10769
IF2011008025	a	83.6	19.77	m	LT	1.01922
IF2011008027	c	56.2	15.94	m	HT	1.31287
IF2011008028	b	64.2	17.86	m	LT	1.06378
IF2011008029	b	91.6	19.64	m	LT	1.13922
IF2011008030	b	47.2	15.92	m	LT	1.10681
IF2011008031	c	73.9	17.69	f	HT	1.26039
IF2011008032	b	71.2	18.61	m	LT	1.04195
IF2011008033	d	56	16.57	m	HT	1.16368
IF2011008034	b	58.6	17.02	m	LT	1.12305
IF2011008035	a	104.9	20.51	f	LT	1.14456
IF2011008036	b	94.6	19.59	m	LT	1.18562
IF2011008037	b	95.2	19.89	f	LT	1.13962
IF2011008038	d	86.9	19.47	f	HT	1.10952
IF2011008039	c	63.7	17.31	m	HT	1.16006
IF2011008041	d	55.6	16.52	m	HT	1.16596
IF2011008042	d	76.4	17.89	m	HT	1.25953
IF2011008043	b	60.3	17.06	m	LT	1.14747
IF2011008044	d	52.4	16.36	m	HT	1.13163
IF2011008045	b	84.2	19.36	m	LT	1.0936
IF2011008046	b	60.8	17.11	m	LT	1.1468
IF2011008047	b	67	17.86	m	LT	1.11018
IF2011008048	a	70.6	18.16	m	LT	1.11244
IF2011008049	c	47.5	15.66	m	LT	1.17064
IF2011008050	b	77.9	18.64	m	LT	1.13446
IF2011008051	b	65	17.61	m	LT	1.12388
IF2011008052	d	78.1	18.44	m	HT	1.17504
IF2011008053	c	68.4	17.59	f	HT	1.18673
IF2011008054	b	80.4	18.57	m	LT	1.18425
IF2011008055	a	47.7	16.36	m	LT	1.03013
IF2011008056	a	61.9	17.23	m	LT	1.14317
IF2011008057	c	41.7	14.98	m	HT	1.17514
IF2011008058	b	89.8	19.16	m	LT	1.20349
IF2011008059	d	42.1	15.04	m	HT	1.17218
IF2011008060	d	104.2	20.17	m	HT	1.19579
IF2011008061	b	66.7	17.61	m	LT	1.15327
IF2011008062	b	53.6	16.55	m	LT	1.11788
IF2011008063	c	75.4	17.93	m	HT	1.23469
IF2011008064	b	92.9	19.48	f	LT	1.18429
IF2011008065	d	101.4	20.04	m	HT	1.18661
IF2011008066	b	92.1	19.61	f	LT	1.15074
IF2011008067	b	141.6	22.41	m	LT	1.1823
IF2011008068	a	64.5	17.94	m	LT	1.05443
IF2011008069	a	42	15.62	m	LT	1.04312
IF2011008070	d	81	18.6	f	HT	1.18729
IF2011008071	b	72.6	18.52	f	LT	1.0781
IF2011008072	d	159.7	22.35	f	HT	1.34427
IF2011008073	a	49.2	16.55	m	LT	1.02611
IF2011008074	a	92	19.41	m	LT	1.18563
IF2011008075	c	70	17.54	m	HT	1.22498
IF2011008076	c	58.7	16.69	m	HT	1.19349
IF2011008077	d	65.7	17.44	m	HT	1.16976
IF2011008078	b	81.1	18.9	f	LT	1.13268
IF2011008079	b	75.7	18.61	f	LT	1.1078
IF2011008080	c	48.2	15.86	m	HT	1.14322
IF2011008081	c	54.5	16.67	m	HT	1.11212
IF2011008082	b	45.7	15.93	m	LT	1.06961
IF2011008083	b	65	17.93	f	LT	1.06439
IF2011008084	b	56.9	16.66	m	LT	1.1632
IF2011008085	d	78.4	18.55	m	HT	1.15856
IF2011008086	b	45.2	16.02	m	LT	1.04006
IF2011008087	d	174.3	23.39	f	HT	1.27887
IF2011008088	c	42.8	15.4	m	HT	1.10951
IF2011008089	b	50	16.46	m	LT	1.06011
IF2011008091	d	104.7	19.94	m	HT	1.24387
IF2011008092	b	66.4	17.84	m	LT	1.10397
IF2011008093	d	47.4	15.26	m	HT	1.26312
IF2011008094	b	44.7	15.74	m	LT	1.08481
IF2011008095	b	126.8	21.53	f	LT	1.19489
IF2011008096	d	88	19.49	f	HT	1.12008
IF2011008097	b	51.5	16.62	m	LT	1.06048
IF2011008098	d	74.7	18.2	m	HT	1.16924
IF2011008099	d	51.5	16.21	m	HT	1.14357
IF2011008100	b	68.2	17.67	m	LT	1.16716
IF2011008101	c	78	18.31	m	HT	1.19888
IF2011008102	c	66.6	17.24	f	HT	1.22781
IF2011008103	d	93.9	19.67	f	HT	1.16246
IF2011008104	b	67.3	17.76	f	LT	1.13422
IF2011008105	b	66.3	18.02	m	LT	1.06938
IF2011008106	a	80.6	19.29	m	LT	1.05836
IF2011008107	a	40.3	15.67	m	LT	0.991281
IF2011008108	d	72.7	18.47	m	LT	1.08844
IF2011008109	b	75.3	18.21	f	LT	1.17668
IF2011008111	b	64.2	17.44	m	LT	1.14305
IF2011008112	c	56.6	16.61	m	HT	1.16762
IF2011008113	b	69.9	18.12	m	LT	1.10876
IF2011008114	b	85.6	18.98	m	LT	1.18037
IF2011008116	a	64.6	16	m	LT	1.49207
IF2011008117	b	70	17.91	m	LT	1.15014
IF2011008118	c	55.7	16.54	m	LT	1.1638
IF2011008119	a	63.8	17.87	m	LT	1.05537
IF2011008120	c	58.9	16.79	m	HT	1.17615
IF2011008121	c	56.1	16.23	m	LT	1.24108
IF2011008122	b	60.8	17.21	f	LT	1.1268
IF2011008123	b	62.9	17.42	m	LT	1.12379
IF2011008124	b	49.4	16.26	m	LT	1.08678
IF2011008125	d	72.3	17.74	m	HT	1.22264
IF2011008126	d	81.5	18.84	m	HT	1.14925
IF2011008127	c	78.6	18.38	m	HT	1.19426
IF2011008128	d	70	17.96	m	HT	1.14049
IF2011008129	c	58	16.72	f	LT	1.17288
IF2011008130	c	54.2	16.61	m	HT	1.11811
IF2011008131	b	68.2	17.78	m	LT	1.14549
IF2011008132	c	53	16.29	m	HT	1.15951
IF2011008133	d	42.7	15.42	m	HT	1.10259
IF2011008134	d	81.7	18.46	m	HT	1.22519
IF2011008136	a	112.4	20.31	f	LT	1.26323
IF2011008137	c	49	15.98	m	HT	1.13604
IF2011008139	b	53.3	16.42	m	LT	1.13841
IF2011008140	b	86.4	18.97	m	LT	1.1933
IF2011008143	b	74.6	18.61	m	LT	1.0917
IF2011008144	a	70.1	18.47	m	LT	1.04951
IF2011008145	a	76.9	18.56	m	LT	1.13454
IF2011008146	c	50	16.26	m	LT	1.09998
IF2011008147	c	92.8	19.09	m	HT	1.25752
IF2011008148	d	88.9	18.51	m	HT	1.32231
IF2011008149	c	124.9	21.31	f	HT	1.21406
IF2011008150	b	67.2	18.22	f	LT	1.04837
IF2011008151	b	48.7	16.46	m	LT	1.03255
IF2011008152	d	106.4	20.49	f	LT	1.16435
IF2011008153	b	35.7	14.82	m	LT	1.03922
IF2011008154	b	82.1	18.61	m	LT	1.20146
IF2011008155	d	44.1	15.81	f	LT	1.056
IF2011008156	b	84	19.36	m	LT	1.091
IF2011008157	b	57.5	17.27	f	LT	1.0545
IF2011008158	d	67.3	18	m	LT	1.08916
IF2011008159	c	34.2	14.11	m	HT	1.15466
IF2011008161	c	61	17.17	f	LT	1.13848
IF2011008162	b	71.9	18.26	f	LT	1.11429
IF2011008163	d	85.5	18.61	f	HT	1.25122
IF2011008165	d	61	17.65	m	LT	1.04752
IF2011008166	b	55	16.64	m	LT	1.12844
IF2011008168	c	89.4	18.48	m	HT	1.33628
IF2011008169	a	73.3	18.66	f	LT	1.06402
IF2011008170	d	54.2	17.15	f	LT	1.01513
IF2011008171	c	72.6	18.44	f	LT	1.09229
IF2011008172	c	43.7	15.42	m	LT	1.12841
IF2011008174	b	65.5	17.58	m	LT	1.13837
IF2011008176	b	60.4	17.31	m	LT	1.09997
IF2011008177	b	64.6	17.74	m	LT	1.09243
IF2011008178	c	87.2	19.27	f	LT	1.14861
IF2011008179	b	39.6	15.29	m	LT	1.04902
IF2011008180	d	52.7	16.1	m	HT	1.19453
IF2011008181	b	94.7	19.42	m	LT	1.21853
IF2011008182	b	108.1	21	f	LT	1.09831
IF2011008187	c	62	17.34	m	HT	1.12322
IF2011008188	b	72.4	18.67	m	LT	1.04926
IF2011008191	d	71.9	17.9	m	HT	1.18335
IF2011008192	d	74.4	18.14	m	HT	1.17622
IF2011008193	d	48.6	16.1	f	LT	1.1016
IF2011008195	b	55.7	17.2	m	LT	1.03409
IF2011008196	c	76.4	18.03	m	HT	1.23023
IF2011008198	c	76.9	18.14	m	LT	1.21574
IF2011008199	c	71.5	18.16	f	LT	1.12662
IF2011008200	c	62.3	17.41	m	LT	1.115
IF2011008201	c	55.8	16.59	f	LT	1.15531
IF2011008202	d	75.7	18.14	m	HT	1.19677
IF2011008203	c	51.7	16.47	m	LT	1.09415
IF2011008205	b	75.1	18.94	f	LT	1.0422
IF2011008207	d	91.5	19.85	f	HT	1.10201
IF2011008208	c	56	16.95	f	LT	1.08666
IF2011008210	a	49.3	16.08	m	LT	1.12166
IF2011008212	b	59.4	17.27	m	LT	1.08934
IF2011008213	b	55.6	17.1	m	LT	1.05057
IF2011008215	d	64.3	16.96	m	HT	1.2455
IF2011008216	c	81.2	18.21	f	HT	1.26888
IF2011008217	c	91.6	19.25	f	LT	1.21036
IF2011008218	d	85.5	18.85	f	HT	1.20372
IF2011008219	c	57.2	16.61	m	HT	1.17999
IF2011008220	b	124.4	21.57	f	LT	1.16572
IF2011008221	b	106.5	20.46	f	LT	1.17062
IF2011008222	c	78.5	18.33	f	HT	1.20259
IF2011008223	c	75.2	17.83	m	HT	1.25239
IF2011008224	b	106.5	20.69	f	LT	1.13176
IF2011008225	b	97.4	20.33	m	LT	1.0914
IF2011008227	b	40.9	15.32	m	LT	1.07706
IF2011008230	c	64.4	17.07	m	HT	1.22332
IF2011008231	b	56.9	16.84	m	LT	1.12605
IF2011008233	b	73.4	18.21	m	LT	1.14699
IF2011008234	b	82.1	19.27	m	LT	1.08143
IF2011008235	c	81.3	19.03	f	LT	1.11221
IF2011008236	a	83.4	18.52	f	LT	1.23848
IF2011008237	b	61.2	17.42	m	LT	1.09342
IF2011008238	a	41.7	15.57	m	LT	1.04574
IF2011008239	d	69.8	17.94	m	HT	1.14107
IF2011008241	b	49.7	16.47	m	LT	1.05182
IF2011008242	c	74.3	18.01	f	HT	1.20043
IF2011008244	c	60.6	17.06	m	HT	1.15318
IF2011008248	d	69.6	17.63	m	HT	1.1993
IF2011008249	b	58.2	17.46	m	LT	1.03264
IF2011008250	d	94.9	19.94	m	HT	1.12745
IF2011008253	b	117.4	20.43	m	LT	1.29616
IF2011008255	c	66.2	17.04	f	HT	1.26421
IF2011008256	b	60.3	17.37	m	LT	1.08673
IF2011008258	b	59.5	17.59	m	LT	1.03232
IF2011008259	d	123.5	21.34	m	HT	1.19536
IF2011008262	b	82.3	18.39	m	LT	1.24843
IF2011008264	d	77.5	18.88	m	HT	1.08586
IF2011008266	c	38.8	15.23	m	LT	1.04011
IF2011008268	a	51.1	16.85	m	LT	1.00946
IF2011008272	d	67	17.75	m	LT	1.13109
IF2011008275	c	56.2	17.03	m	LT	1.07515
IF2011008276	b	86.9	19.42	f	LT	1.11817
IF2011008279	d	75.8	18.57	m	HT	1.1165
IF2011008280	c	59	17.31	m	HT	1.07447
IF2011008281	b	70.7	18.14	f	LT	1.11772
IF2011008282	d	138.7	21.66	m	HT	1.28348
IF2011008283	c	70.1	17.48	m	LT	1.23949
IF2011008284	b	155.9	23.28	m	LT	1.16027
IF2011008287	b	58	17.09	f	LT	1.09786
IF2011008294	b	73	18.1	m	LT	1.16181
IF2011008295	d	75.8	18.02	m	HT	1.22262
IF2011008302	c	61.5	17.11	m	LT	1.16001
IF2011008304	a	60.2	17.11	m	LT	1.13549
IF2011008305	c	48.4	16.02	m	LT	1.11369
IF2011008309	b	95.5	19.76	f	LT	1.16608
IF2011008311	b	59.6	17.16	m	LT	1.1143
IF2011008312	c	122.9	20.88	f	LT	1.27047
IF2011008314	d	63.6	17.04	m	HT	1.21456
IF2011008319	b	63.5	17.37	f	LT	1.1444
IF2011008320	a	67.4	18.11	m	LT	1.07089
IF2011008321	d	57.9	16.3	m	HT	1.26436
IF2011008322	b	72.7	18.02	m	LT	1.17261
IF2011008325	c	69.3	17.55	m	HT	1.21064
IF2011008326	c	71.6	17.56	m	HT	1.24867
IF2011008328	c	63.1	17.26	m	LT	1.15922
IF2011008329	a	57.6	17.36	m	LT	1.03988
IF2011008337	b	43.8	15.81	m	LT	1.04882
IF2011008338	b	80.3	18.96	m	LT	1.11082
IF2011008341	d	105.8	20.01	f	HT	1.24371
IF2011008343	b	82.7	19.08	f	LT	1.12243
IF2011008344	b	38.1	14.98	m	LT	1.07369
IF2011008345	b	63.9	17.11	f	LT	1.20527
IF2011008347	b	67.9	17.4	f	LT	1.21734
IF2011008348	a	67.3	18.24	m	LT	1.04645
IF2011008349	a	55.8	16.85	m	LT	1.10231
IF2011008351	b	94.8	19.6	f	LT	1.1863
IF2011008352	b	121	20.94	m	LT	1.24004
IF2011008353	b	73.1	18.37	f	LT	1.11252
IF2011008356	d	66.7	17.8	m	LT	1.1165
IF2011008357	b	61.7	17.35	m	LT	1.11584
IF2011008359	b	39.5	15.37	m	LT	1.03001
IF2011008361	b	58.8	16.77	m	LT	1.17839
IF2011008364	b	117.8	20.74	m	LT	1.24275
IF2011008365	d	43.5	15.76	m	HT	1.05165
IF2011008366	a	74.9	18.68	m	LT	1.08374
IF2011008369	b	67.1	17.86	f	LT	1.11184
IF2011008373	c	95	19.21	m	HT	1.2632
IF2011008374	b	66.3	17.94	f	LT	1.08385
IF2011008378	a	42.3	15.97	m	LT	0.982561
IF2011008379	b	60.8	17.32	f	LT	1.10532
IF2011008381	b	80.3	18.66	m	LT	1.16563
IF2011008382	a	73.4	18.43	m	LT	1.10614
IF2011008383	c	43.4	15.45	m	LT	1.1141
IF2011008384	b	80	18.59	f	LT	1.17454
IF2011008385	d	80	18.82	m	HT	1.13172
IF2011008386	b	57.9	16.88	m	LT	1.13766
IF2011008388	b	60.8	17.11	m	LT	1.1468
IF2011008391	b	49.3	16.06	m	LT	1.12589
IF2011008392	a	41.6	15.71	m	LT	1.01541
IF2011008393	d	73.2	18.4	m	HT	1.10857
IF2011008394	b	52.6	16.68	f	LT	1.07141
IF2011008396	c	90.9	18.97	f	HT	1.25545
IF2011008397	b	68	17.81	m	LT	1.13633
IF2011008398	b	78.8	18.4	f	LT	1.19337
IF2011008400	b	36.5	14.6	m	LT	1.1116
IF2011008402	d	66	17.29	m	HT	1.20615
IF2011008403	d	102.9	20.73	m	LT	1.08714
IF2011008404	b	59.6	17.26	m	LT	1.09492
IF2011008408	b	44.9	15.66	m	LT	1.10656
IF2011008409	b	56.9	17.27	m	LT	1.04349
IF2011008411	c	53.4	16.6	m	LT	1.10361
IF2011008412	b	46.6	16.19	m	LT	1.03863
IF2011008414	c	60.5	17.01	f	LT	1.16152
IF2011008415	d	74.1	18.17	f	HT	1.16565
IF2011008416	b	52.7	16.61	m	LT	1.08716
IF2011008419	d	105.6	20.21	f	HT	1.20463
IF2011008420	b	76.9	18.54	m	LT	1.13824
IF2011008421	b	50.9	16.36	m	LT	1.09924
IF2011008424	c	46.9	15.43	m	LT	1.20867
IF2011008425	a	76.5	18.54	m	LT	1.13232
IF2011008427	c	55.3	16.58	m	LT	1.14704
IF2011008428	a	63.2	17.34	m	LT	1.14496
IF2011008429	b	73.4	17.96	m	LT	1.19589
IF2011008431	c	45.4	15.61	m	LT	1.12974
IF2011008432	c	41.2	15.33	m	LT	1.08283
IF2011008433	d	66.8	18.34	f	LT	1.02167
IF2011008434	b	92.3	19.46	m	LT	1.18029
IF2011008438	c	44.7	15.49	m	LT	1.13855
IF2011008439	a	70.6	18.07	m	LT	1.12925
IF2011008440	b	67.9	17.94	m	LT	1.11001
IF2011008443	b	56.9	16.61	m	LT	1.17381
IF2011008446	b	49.2	16.1	m	LT	1.1152
IF2011008448	d	45.9	15.35	m	LT	1.20162
IF2011008450	b	48.7	16.03	m	LT	1.11848
IF2011008451	b	76.5	18.22	m	LT	1.19345
IF2011008452	b	39.3	15.31	m	LT	1.03697
IF2011008454	c	42.2	15.42	m	LT	1.08968
IF2011008455	d	52.8	16.58	m	LT	1.09519
IF2011008458	b	58.1	17.26	m	LT	1.06736
IF2011008460	b	56	16.93	f	LT	1.09055
IF2011008461	a	96.3	19.92	m	LT	1.14755
IF2011008462	a	48	16.02	m	LT	1.10449
IF2011008464	d	50	16.31	m	LT	1.08983
IF2011008466	a	42.4	15.68	m	LT	1.04093
IF2011008467	b	90.8	19.54	m	LT	1.14682
IF2011008468	a	51.9	16.16	m	LT	1.16325
IF2011008469	a	61.5	17.33	m	LT	1.1161
IF2011008473	d	58.5	17.03	f	LT	1.11915
IF2011008475	c	41.7	15.69	m	LT	1.02177
IF2011008476	b	59.8	17.36	m	LT	1.0796
IF2011008477	c	55.5	16.6	m	LT	1.14701
IF2011008480	c	56.1	16.87	m	LT	1.10427
IF2011008481	c	79.8	18.47	f	LT	1.19474
IF2011008482	d	111.7	20.95	f	HT	1.14308
IF2011008486	b	63.4	17.63	m	LT	1.09246
IF2011008487	a	57.1	16.73	m	LT	1.1526
IF2011008488	d	79.1	18.9	f	LT	1.10474
IF2011008489	b	80.5	19	m	LT	1.10652
IF2011008490	d	53	16.88	m	LT	1.04138
IF2011008492	a	70.1	17.92	f	LT	1.14984
IF2011008495	d	55.1	16.75	m	LT	1.10822
IF2011008496	d	47.8	15.97	m	LT	1.11032
IF2011008497	d	58.8	17.4	m	LT	1.05419
IF2011008498	b	76.1	18.17	m	LT	1.19711
IF2011008499	d	54.4	16.95	f	LT	1.05562
IF2011009060	a	89.1	19.29	m	HT	1.16997
IF2011009074	b	59.2	17.26	m	HT	1.08757
IF2011009091	a	127.5	21.04	m	HT	1.28799
IF2011009105	a	43.5	15.31	m	HT	1.14779
IF2011009112	b	86.6	18.84	m	HT	1.22116
IF2011009113	a	65.4	17.72	m	HT	1.10973
IF2011009115	b	60.1	17.21	m	HT	1.11382
IF2011009118	b	57.6	16.92	m	HT	1.12371
IF2011009120	b	82	18.59	m	HT	1.2039
IF2011009122	a	94.5	19.19	m	HT	1.26051
IF2011009126	b	85.5	19.41	m	HT	1.10187
IF2011009127	b	62.2	17.37	m	HT	1.12097
IF2011009130	b	52.5	16.45	m	HT	1.11516
IF2011009134	b	85.2	18.58	m	HT	1.25291
IF2011009135	b	74.4	18.02	m	HT	1.20003
IF2011009141	b	67.2	17.36	m	HT	1.21319
IF2011009142	d	126	21.72	m	HT	1.15626
IF2011009143	a	85.6	19.33	m	HT	1.117
IF2011009145	b	66.9	17.67	m	HT	1.14491
IF2011009147	b	50.4	16.08	m	HT	1.14669
IF2011009150	b	89.8	19.53	f	HT	1.13594
IF2011009151	a	57.9	17.35	m	HT	1.04711
IF2011009158	b	61.7	17.67	m	HT	1.05592
IF2011009159	b	117.3	21.05	m	HT	1.18325
IF2011009161	b	87.5	19.19	f	HT	1.16714
IF2011009162	a	77.7	18.58	m	HT	1.14262
IF2011009163	b	88.6	18.57	f	HT	1.30503
IF2011009164	a	52.9	16.48	m	HT	1.11749
IF2011009167	a	62.2	16.97	m	HT	1.20268
IF2011009171	b	58.1	16.44	m	HT	1.23638
IF2011009178	b	60.5	17.18	m	HT	1.12716
IF2011009179	b	92.6	18.97	m	HT	1.27893
IF2011009181	b	63.8	17.21	m	HT	1.18239
IF2011009182	b	51.3	16.47	m	HT	1.08568
IF2011009185	a	105.7	20.34	m	HT	1.18265
IF2011009186	a	88.4	19.47	m	HT	1.12867
IF2011009191	b	70.4	17.59	m	HT	1.22143
IF2011009195	b	49	16.03	m	HT	1.12537
IF2011009199	b	60.1	17.19	m	HT	1.11774
IF2011009201	a	103.8	20.19	m	HT	1.18764
IF2011009202	b	61.8	17.66	m	HT	1.05944
IF2011009203	b	86.3	19.02	m	HT	1.18248
IF2011009204	b	44.2	15.6	m	HT	1.10201
IF2011009207	b	60.6	17.15	m	HT	1.135
IF2011009208	d	59.2	16.85	m	HT	1.16947
IF2011009209	b	55.4	16.79	m	HT	1.10626
IF2011009210	b	96.5	19.42	m	HT	1.24169
IF2011009212	b	62.4	17.66	m	HT	1.06973
IF2011009214	b	93.6	19.19	m	HT	1.2485
IF2011009215	b	58.1	16.93	m	HT	1.13144
IF2011009217	b	65	17.44	m	HT	1.15729
IF2011009218	d	106.2	20.56	m	HT	1.15026
IF2011009220	b	71.9	17.55	m	HT	1.25606
IF2011009221	b	69.4	17.68	m	HT	1.18567
IF2011009222	b	61.1	16.79	m	HT	1.22008
IF2011009225	c	74.9	17.7	m	HT	1.27527
IF2011009226	a	91.2	19.53	m	HT	1.15365
IF2011009228	d	66.3	17.59	f	HT	1.1503
IF2011009229	a	82.7	19.47	m	HT	1.05589
IF2011009230	a	61.1	17.42	m	HT	1.09163
IF2011009231	a	81.5	18.84	m	HT	1.14925
IF2011009233	b	82.3	18.62	f	HT	1.20243
IF2011009234	b	99.4	19.26	m	HT	1.31137
IF2011009235	c	70.2	17.51	m	HT	1.23485
IF2011009236	b	90.3	19.49	f	HT	1.14936
IF2011009237	b	90.3	19.07	m	HT	1.22752
IF2011009239	d	68.7	17.98	m	HT	1.11556
IF2011009240	b	54.2	16.92	m	HT	1.05738
IF2011009241	c	88.9	18.79	m	HT	1.2637
IF2011009243	b	57.9	17.04	m	HT	1.10571
IF2011009244	b	95.7	19.55	m	HT	1.20684
IF2011009245	b	68.6	17.71	m	HT	1.16601
IF2011009246	b	57.1	16.47	m	HT	1.20843
IF2011009248	a	77	18.36	m	HT	1.1738
IF2011009249	b	55.7	16.5	m	HT	1.17234
IF2011009251	c	62.4	17.34	m	HT	1.13046
IF2011009252	a	65.4	17.76	m	HT	1.1022
IF2011009255	a	58.1	16.39	m	HT	1.24781
IF2011009256	b	79.1	18.62	m	HT	1.15568
IF2011009257	a	46.7	14.72	m	HT	1.38751
IF2011009258	b	83	19.14	m	HT	1.11587
IF2011009259	b	45.5	15.91	m	HT	1.06897
IF2011009260	a	57.5	17.02	m	HT	1.10197
IF2011009262	a	47.5	16.34	m	HT	1.02961
IF2011009263	a	66	17.79	m	HT	1.10666
IF2011009264	b	74.7	17.91	f	HT	1.22736
IF2011009265	a	62.1	17.27	m	HT	1.13886
IF2011009267	c	114.6	20.82	f	HT	1.19501
IF2011009269	a	61.5	15.38	m	HT	1.60054
IF2011009271	c	71.6	17.8	m	HT	1.19852
IF2011009272	b	67.7	17.46	m	HT	1.2012
IF2011009273	d	77	18.32	m	HT	1.18156
IF2011009274	b	109.2	20.08	m	HT	1.27021
IF2011009275	b	73.9	18.6	m	HT	1.08322
IF2011009276	b	101.9	18.74	m	HT	1.46019
IF2011009278	b	60.1	16.98	m	HT	1.16001
IF2011009279	c	73	18.17	m	HT	1.14834
IF2011009280	b	104	20.27	m	HT	1.1758
IF2011009281	b	110.2	19.76	m	HT	1.34557
IF2011009283	a	67.4	17.52	m	HT	1.18355
IF2011009284	a	106.2	20.43	m	HT	1.1725
IF2011009285	b	47.3	15.95	m	HT	1.10287
IF2011009287	b	52.7	15.96	m	HT	1.22645
IF2011009288	a	58.9	17.01	m	HT	1.13081
IF2011009290	b	49.1	16.01	m	HT	1.13193
IF2011009291	d	86.1	18.96	m	HT	1.19105
IF2011009292	a	78.8	18.77	m	HT	1.12374
IF2011009293	c	120.5	20.98	f	HT	1.22782
IF2011009294	b	112.7	20.46	m	HT	1.23876
IF2011009295	b	98.3	19.8	m	HT	1.19296
IF2011009298	b	69.5	17.54	m	HT	1.21623
IF2011009299	b	63.9	17.06	m	HT	1.21597
IF2011009300	d	94.6	19.52	f	HT	1.19851
IF2011009302	b	61.2	16.87	m	HT	1.20466
IF2011009303	b	89.7	18.84	m	HT	1.26488
IF2011009305	c	57.2	16.77	m	HT	1.14632
IF2011009306	b	95.3	19.61	m	HT	1.19072
IF2011009307	b	62.7	16.87	m	HT	1.23418
IF2011009308	a	103	20.65	m	HT	1.10098
IF2011009309	b	84.7	18.89	f	HT	1.18485
IF2011009310	b	65.5	17.52	m	HT	1.15019
IF2011009313	b	88.9	19.2	m	HT	1.18395
IF2011009314	c	68.1	17.39	m	HT	1.22304
IF2011009315	a	83.9	18.68	m	HT	1.21396
IF2011009316	c	89.1	19.45	f	HT	1.14114
IF2011009317	b	79.5	18.86	m	HT	1.11746
IF2011009318	c	59.4	16.68	m	HT	1.20991
IF2011009319	a	78.6	18.32	m	HT	1.20611
IF2011009321	b	57.5	16.81	m	HT	1.14407
IF2011009322	b	83.8	19.05	m	HT	1.14278
IF2011009323	b	94.1	19.27	m	HT	1.2395
IF2011009324	a	69.4	17.76	m	HT	1.16961
IF2011009325	c	66.3	17.57	f	HT	1.15426
IF2011009326	b	59.4	17.11	m	HT	1.1204
IF2011009327	d	92	19.47	m	HT	1.17463
IF2011009328	b	85.6	18.91	m	HT	1.19362
IF2011009330	a	59.8	17.19	m	HT	1.11216
IF2011009331	d	57.8	16.94	m	HT	1.12359
IF2011009332	c	71.4	18.23	f	HT	1.11205
IF2011009333	d	77.4	18.66	m	HT	1.12354
IF2011009335	b	107.3	20.46	m	HT	1.17941
IF2011009336	a	113.3	20.64	m	HT	1.21285
IF2011009337	b	111.7	20.47	m	HT	1.22596
IF2011009338	b	82.1	18.5	m	HT	1.22316
IF2011009339	d	63.4	17.82	m	HT	1.05766
IF2011009341	d	71.6	18.01	m	HT	1.15681
IF2011009342	b	51.3	16.51	m	HT	1.07776
IF2011009343	b	68.8	17.69	m	HT	1.17341
IF2011009344	a	71.9	18.44	m	HT	1.08176
IF2011009345	c	57.7	17.07	f	HT	1.09605
IF2011009346	d	66.9	18.04	m	HT	1.07545
IF2011009347	b	60.6	17.54	m	HT	1.06048
IF2011009348	b	114.2	20.51	m	HT	1.24603
IF2011009349	a	70.2	18.12	m	HT	1.11352
IF2011009350	d	117.6	20.57	m	HT	1.27186
IF2011009351	b	116.2	20.76	m	HT	1.2223
IF2011009353	d	75.2	18.39	f	HT	1.14073
IF2011009355	a	66.5	17.26	m	HT	1.22168
IF2011009356	b	59.9	16.49	m	HT	1.26305
IF2011009357	b	59.7	16.72	m	HT	1.20726
IF2011009358	a	71.2	17.78	m	HT	1.19588
IF2011009359	b	84.1	18.77	f	HT	1.19932
IF2011009362	c	56.8	16.76	m	HT	1.14036
IF2011009363	b	61.8	18.41	m	HT	0.934385
IF2011009364	a	90.2	19.37	m	HT	1.1697
IF2011009366	b	54.2	16.67	m	HT	1.106
IF2011009367	a	59.9	17.15	m	HT	1.12189
IF2011009368	a	84.2	19.15	m	HT	1.13022
IF2011009369	c	53.3	16.63	m	HT	1.09555
IF2011009370	a	46.8	16.22	m	HT	1.03727
IF2011009371	b	114.3	20.87	m	HT	1.18328
IF2011009372	d	61.3	17.66	m	HT	1.05087
IF2011009373	b	77.3	18.37	m	HT	1.17644
IF2011009374	d	79.7	18.43	f	HT	1.20108
IF2011009376	d	90.7	19.16	m	HT	1.21555
IF2011009377	a	57.1	17.16	m	HT	1.06756
IF2011009378	c	59.2	17.62	m	HT	1.02184
IF2011009379	d	47.8	16.31	m	HT	1.04188
IF2011009380	a	74.4	18.06	m	HT	1.19202
IF2011009381	b	75.9	18.26	m	HT	1.17628
IF2011009382	a	91.9	19.4	m	HT	1.18619
IF2011009383	b	80.8	18.56	m	HT	1.19208
IF2011009384	a	68.1	18.17	m	HT	1.07126
IF2011009385	b	31.7	14.17	m	HT	1.05663
IF2011009386	b	109.3	20.36	f	HT	1.2193
IF2011009387	d	80.7	18.97	m	HT	1.11458
IF2011009389	d	79.5	19.2	f	HT	1.05876
IF2011009390	c	65.7	17.02	m	HT	1.25912
IF2011009391	b	78.1	18.06	m	HT	1.25131
IF2011009392	c	80.3	18.58	f	HT	1.18086
IF2011009393	b	71.6	17.84	m	HT	1.19042
IF2011009394	d	59.8	17.66	m	HT	1.02515
IF2011009395	a	62.8	17.61	m	HT	1.08584
IF2011009396	b	77.2	18.21	m	HT	1.20637
IF2011009397	d	99.9	20.04	m	HT	1.16905
IF2011009398	b	62.9	17.44	m	HT	1.1199
IF2011009399	b	103.8	20.22	m	HT	1.18233
IF2011009400	a	61.6	17.39	m	HT	1.10631
IF2011009401	c	51	16.35	m	HT	1.10343
IF2011009402	c	57.1	16.88	f	HT	1.12194
IF2011009403	b	63.2	17.32	f	HT	1.14895
IF2011009404	a	70.1	17.82	m	HT	1.16944
IF2011009405	b	74.7	18.37	m	HT	1.13687
IF2011009406	c	89.7	19.21	f	HT	1.19272
IF2011009407	d	80.3	18.75	m	HT	1.14882
IF2011009408	b	73.7	18.05	m	HT	1.18279
IF2011009409	d	60.5	17.24	m	HT	1.11535
IF2011009410	d	57	16.97	m	HT	1.10214
IF2011009411	b	84.6	18.66	m	HT	1.22805
IF2011009412	c	63.2	17.29	m	HT	1.15498
IF2011009413	c	70.3	18.07	m	HT	1.12445
IF2011009414	b	85.9	18.77	f	HT	1.22499
IF2011009415	c	64.1	17.24	m	HT	1.18172
IF2011009416	b	85.4	18.76	m	HT	1.21982
IF2011009418	b	88	18.97	m	HT	1.2154
IF2011009419	d	58.9	16.81	m	HT	1.17193
IF2011009420	b	70.2	18.16	f	HT	1.10613
IF2011009421	d	70.9	18.37	m	HT	1.07904
IF2011009423	c	71.9	17.83	m	HT	1.19743
IF2011009424	c	68.4	17.72	f	HT	1.16064
IF2011009425	d	57.1	17.06	m	HT	1.08657
IF2011009426	d	61.3	16.94	m	HT	1.19163
IF2011009427	d	78.2	18.44	f	HT	1.17655
IF2011009428	a	64.2	17.31	m	HT	1.16917
IF2011009429	b	70.1	17.96	m	HT	1.14212
IF2011009430	c	69.3	17.74	m	HT	1.17191
IF2011009432	d	57.3	16.81	m	HT	1.14009
IF2011009434	a	98.3	20.24	f	HT	1.11634
IF2011009435	b	40.4	15.52	m	HT	1.02303
IF2011009436	d	56.7	17.14	m	HT	1.06383
IF2011009437	b	69.7	17.79	m	HT	1.1687
IF2011009438	b	110.8	20.17	f	HT	1.27153
IF2011009439	c	67.4	17.66	m	HT	1.15544
IF2011009440	b	51	16.4	m	HT	1.09331
IF2011009441	d	76.5	18.23	m	HT	1.19148
IF2011009442	b	94.5	19.62	m	HT	1.17891
IF2011009444	d	77.4	18.44	f	HT	1.16451
IF2011009445	b	81.4	18.88	m	HT	1.14051
IF2011009446	b	79.6	18.73	m	HT	1.14248
IF2011009447	d	54.5	16.55	m	HT	1.13665
IF2011009448	d	52.2	16.17	m	HT	1.16779
IF2011009449	d	86.2	19.24	m	HT	1.1408
IF2011009450	d	131.8	21.59	f	HT	1.23161
IF2011009451	b	59	16.81	m	HT	1.17392
IF2011009452	c	74.2	18.16	f	HT	1.16916
IF2011009453	b	68.5	17.85	m	HT	1.13695
IF2011009454	d	99	20.42	f	HT	1.09463
IF2011009455	a	61.1	17.28	m	HT	1.11856
IF2011009456	b	43.7	15.76	f	HT	1.05648
IF2011009457	d	50.5	16.71	m	HT	1.02306
IF2011009458	b	82.2	18.53	m	HT	1.21868
IF2011009459	d	90.2	19.23	f	HT	1.19561
IF2011009461	b	108.9	19.9	m	HT	1.30164
IF2011009462	a	77.7	18.34	m	HT	1.18838
IF2011009463	d	121.2	21.18	f	HT	1.20007
IF2011009464	d	57.4	16.46	m	HT	1.21701
IF2011009465	d	71.4	18.22	m	HT	1.11389
IF2011009466	b	71.3	17.99	m	HT	1.15583
IF2011009467	c	72.4	18.31	m	HT	1.11281
IF2011009468	b	90.8	19.39	f	HT	1.17382
IF2011009469	a	46.1	15.22	m	HT	1.23825
IF2011009470	a	57.8	16.69	m	HT	1.17519
IF2011009471	d	63.4	17.77	m	HT	1.06668
IF2011009472	b	54.6	16.61	m	HT	1.12636
IF2011009475	d	81.7	18.85	m	HT	1.15022
IF2011009476	d	50.7	16.54	m	HT	1.05933
IF2011009477	a	80.7	18.69	m	HT	1.16577
IF2011009478	b	84.7	18.79	m	HT	1.20399
IF2011009479	b	106.3	20.56	f	HT	1.15134
IF2011009480	d	44.9	15.87	m	HT	1.06293
IF2011009481	b	81.6	18.4	m	HT	1.23578
IF2011009485	c	52.1	16.36	m	HT	1.12515
IF2011009486	b	111.6	20.41	m	HT	1.23577
IF2011009487	c	103.3	19.89	m	HT	1.23658
IF2011009488	d	88.1	19.85	f	HT	1.06106
IF2011009489	d	60	17.44	m	HT	1.06827
IF2011009490	a	97.8	19.37	f	HT	1.26826
IF2011009491	b	62.3	17.48	m	HT	1.10157
IF2011009492	b	81.6	18.54	m	HT	1.20781
IF2011009493	c	57	16.91	m	HT	1.11399
IF2011009494	b	123.3	21.21	f	HT	1.21565
IF2011009495	d	70.2	17.84	m	HT	1.16714
IF2011009496	c	72.4	17.97	m	HT	1.17762
IF2011009498	d	78.7	18.87	f	HT	1.10444
IF2011009500	a	54.4	16.64	m	HT	1.11613

## Sheet: SDG_tank
Father	BW_HT1	BW_LT1	BW_HT2	BW_LT2
a	32.651	30.7286	36.1758	44.2437
b	17.8874	21.2519	12.9869	10.8695
c	21.3433	35.6112	22.3232	30.3697
d	38.9307	4.92052	29.2454	34.7415
